# Supplementary material for: Biomimetic CuO/ZTF-8 nanozyme-based neoteric sensor for the selective detection of superoxide anions
Source: Royal Society of Chemistry journal article supplement (doi:10.1039/d4ta07300b), 2024-12-16
Supplement: d4ta07300b1.pdf [file d4ta07300b1.pdf]

## Electronic Supplementary Information

### **Biomimetic CuO/ZTF-8 nanozyme based neoteric sensor towards selective detection of superoxide anion**

Vadakke Purakkal Sruthi<sup>1†</sup>, Shafeeq Sarfudeen<sup>1†</sup>, Tamas Panda<sup>2</sup>, Kathavarayan Thenmozhi<sup>1</sup>, Sellappan Senthilkumar<sup>1\*</sup>

<sup>1</sup>Department of Chemistry, School of Advanced Sciences, Vellore Institute of Technology (VIT), Vellore, Tamil Nadu, India-632014

<sup>2</sup>Centre for Clean Environment (CCE), Vellore Institute of Technology, Vellore (VIT), Tamil Nadu, India-632014

Corresponding Author:

\*Email: [senthilanalytical@gmail.com](mailto:senthilanalytical@gmail.com), [senthilkumar.s@vit.ac.in](mailto:senthilkumar.s@vit.ac.in)

† The authors have contributed equally towards this work

## Materials and methods

Zinc oxide powder (ZnO, 99.9%) was obtained from Sigma-Aldrich Pvt., Ltd. 5-methyl tetrazole (mtz, C<sub>2</sub>H<sub>4</sub>N<sub>4</sub>, 98.0%), copper acetate monohydrate (Cu(CO<sub>2</sub>CH<sub>3</sub>)<sub>2</sub>·H<sub>2</sub>O, 98.0%) was purchased from Tokyo Chemical Industry Co., Ltd. Methanol (CH<sub>3</sub>OH) was purchased from Central Drug House Pvt., Ltd. Potassium dioxide (KO<sub>2</sub>) and dopamine hydrochloride (DA) were procured from Sigma-Aldrich. Uric acid (UA), tryptophan (L-Tryp), cholesterol (Chol), glucose (Glu), ammonia solution, N, N-Dimethyl Formamide (DMF) and sodium hydroxide pellets (NaOH) were purchased from SRL chemicals, India. Hydrogen peroxide (H<sub>2</sub>O<sub>2</sub>) and ascorbic acid (AA) was obtained from Merck, India. Potassium perchlorate (KClO<sub>3</sub>) was obtained from Alfa Aesar, India and potassium nitrite (KNO<sub>2</sub>) was bought from Avra Chemicals, India. All the chemicals and solvents were used without further purification.

## Instrumentation

Powder X-ray diffraction was recorded from Bruker DS advance instrument using iron-filtered Cu K $\alpha$  radiation ( $\lambda=1.5406 \text{ \AA}$ ). Field Emission Scanning Electron Microscopic (FE-SEM) was performed using Thermo-Fisher FEI QUANTA 250 FEG under high vacuum conditions at an operating voltage range of 5 kV – 30 kV. High resolution transmission electron microscopic studies were carried out in JEOL JEM 2100 with LaB<sub>6</sub> as electron source. X-ray photoelectron spectroscopic studies were recorded using PHI5000 Version Probe III. Electron spin resonance studies were done using JEOL JES FA200 with X-band frequency of 8.75 - 9.65 GHz. All electrochemical studies were carried out using CHI-760E electrochemical workstation. A conventional three-electrode system with glassy carbon electrode as the working electrode, Ag/AgCl as the reference electrode and platinum coil as the counter electrode were employed to conduct all the electrochemical studies.

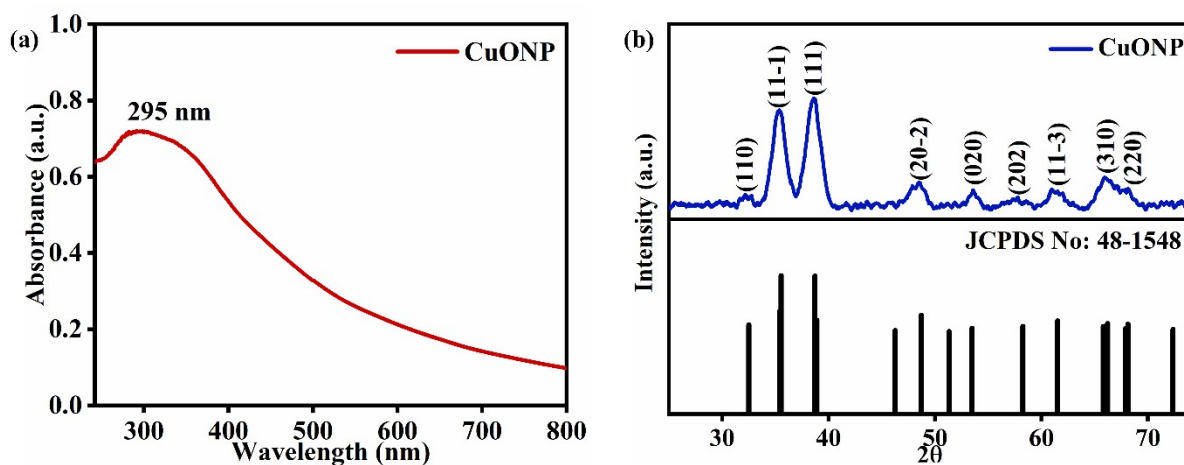

**Fig. S1 (a)** UV-vis spectrum and **(b)** PXRD pattern of CuONP.

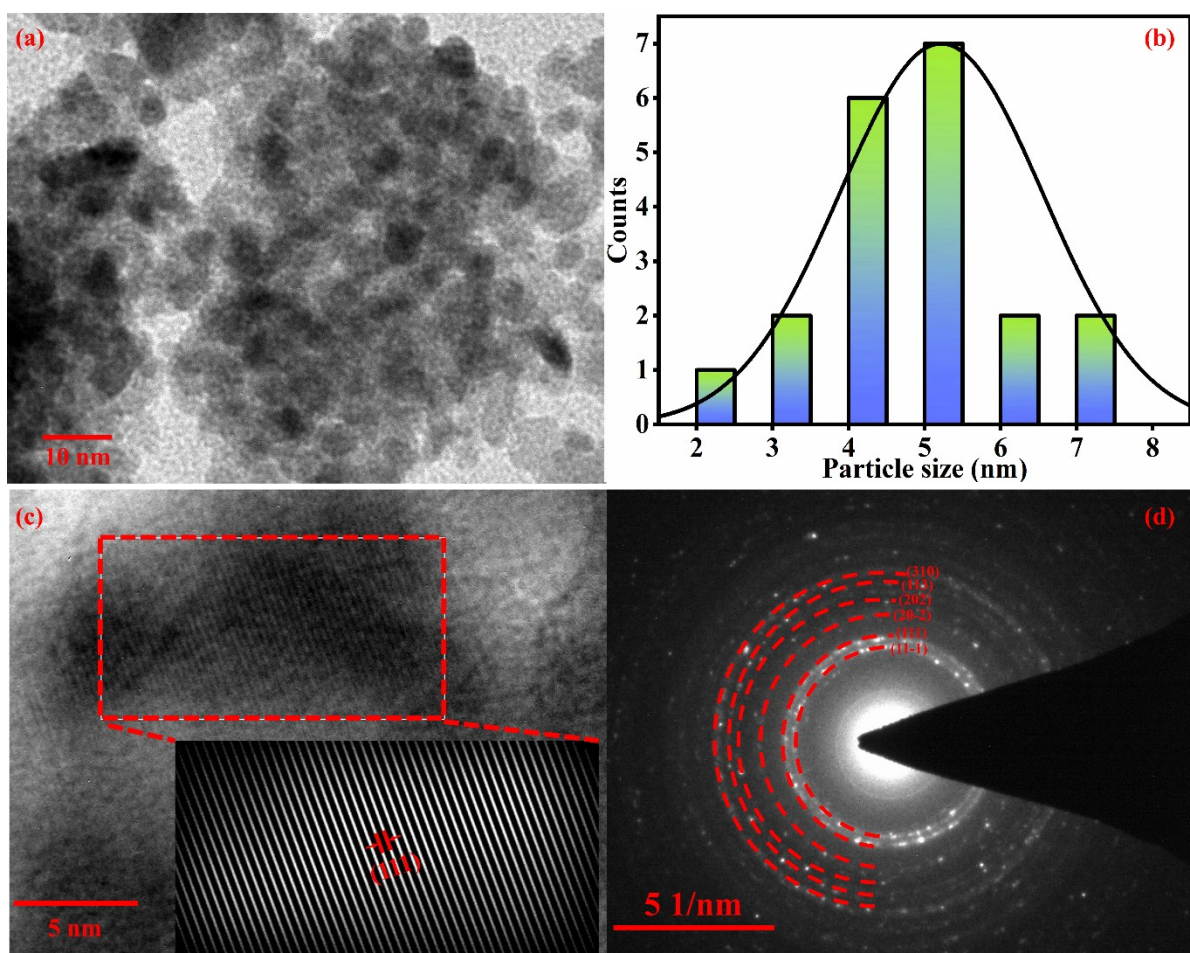

**Fig. S2 (a and c)** HRTEM images **(b)** size distribution curve and **(d)** SAED pattern of CuONP.

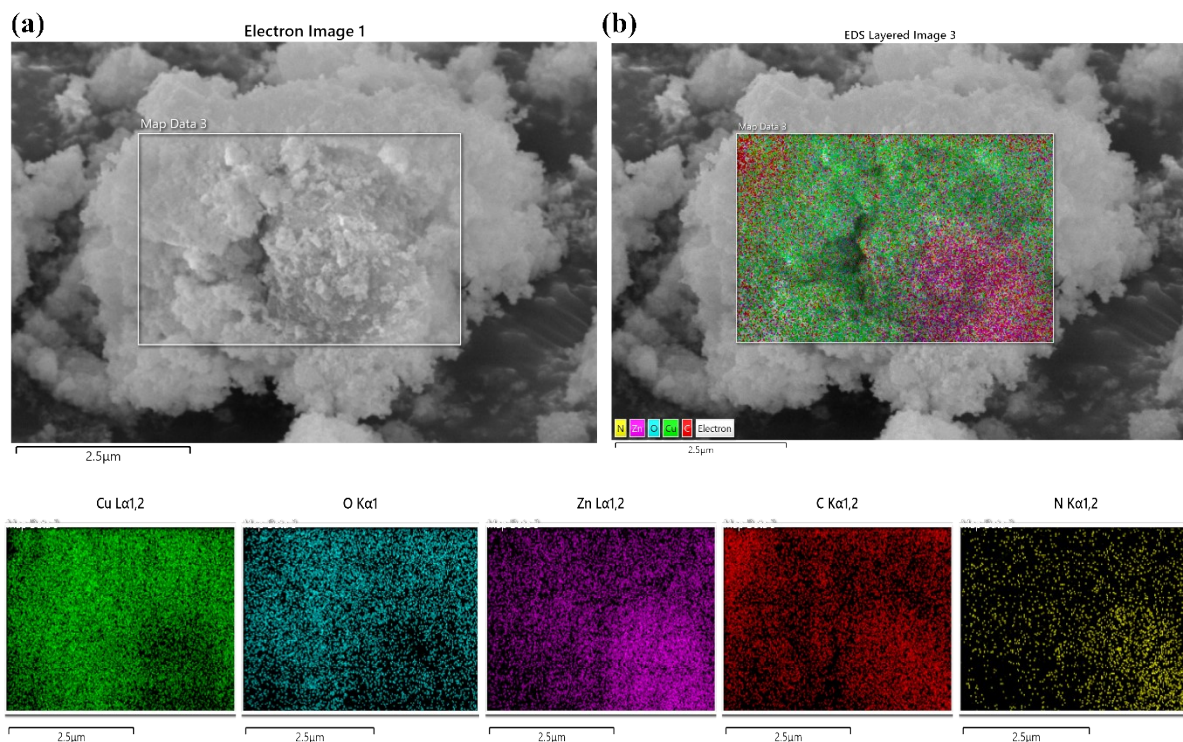

**Fig. S3** FESEM and elemental analysis of CuO/ZTF-8 nanocomposite.

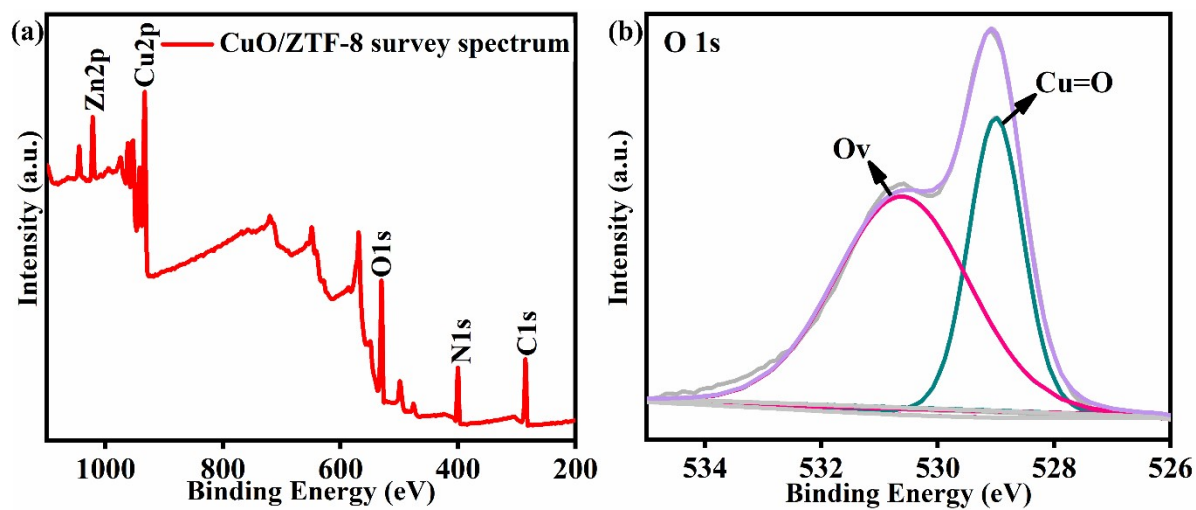

**Fig. S4** XPS (a) survey spectrum and (b) O 1s spectrum of CuO/ZTF-8 nanocomposite.

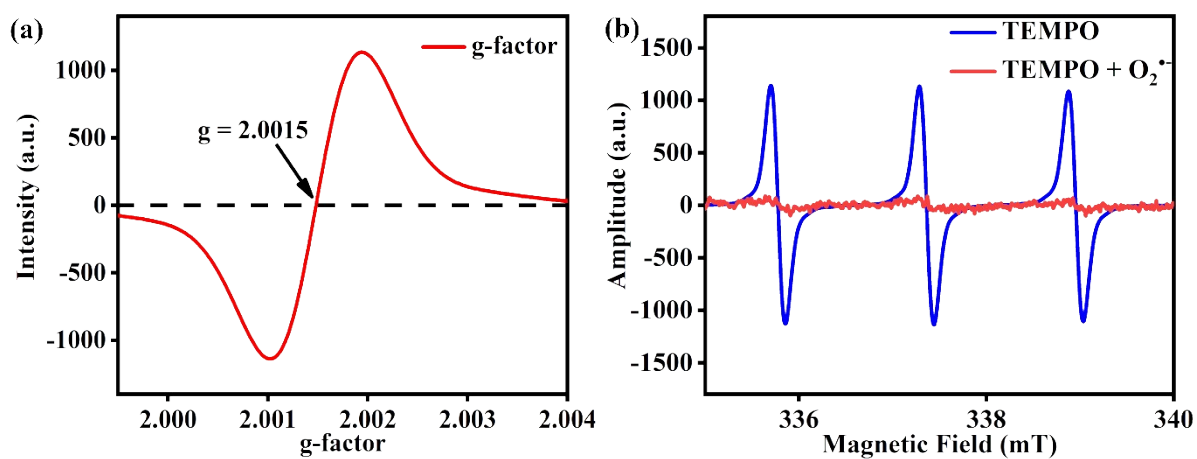

**Fig. S5** (a) g-factor plot of TEMPO. (b) ESR spectrum of TEMPO in the presence and absence of O<sub>2</sub><sup>•-</sup>.

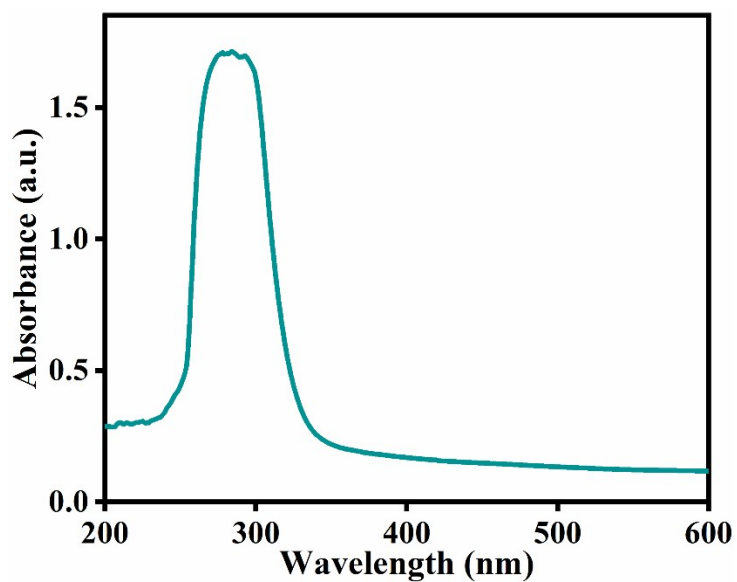

**Fig. S6** Absorbance spectra of 7.1 mg of KO<sub>2</sub> in DMSO in the presence of 18-crown-6.

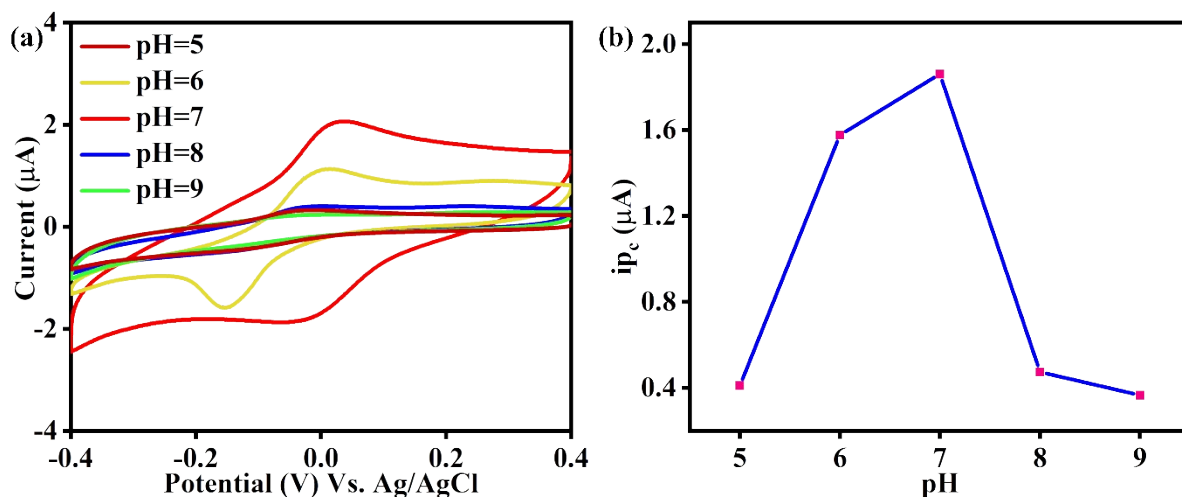

**Fig. S7** (a) CVs of CuO/ZTF-8/GCE in 0.1 M PBS at different pH values (pH: 5.0, 6.0, 7.0, 8.0, and 9.0) at a scan rate of 50 mV s<sup>-1</sup>. (b) Effect of pH on the cathodic peak current of CuO/ZTF-8/GCE.

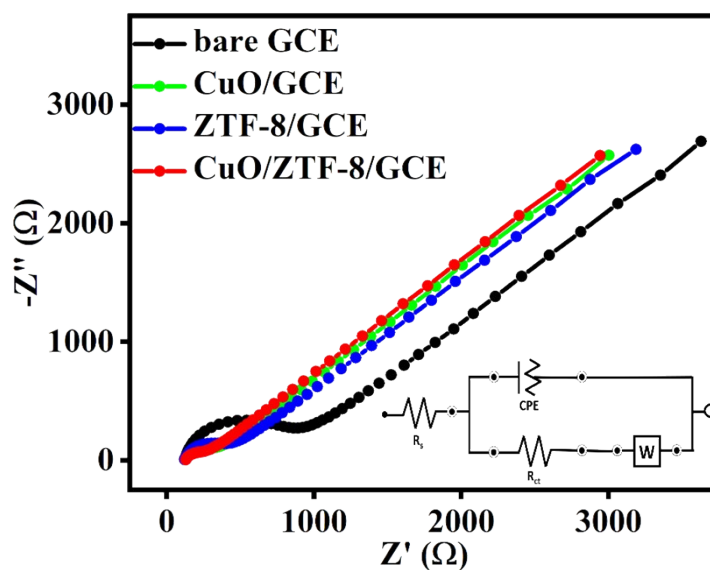

**Fig. S8** Electrochemical impedance spectra of bare GCE, CuO/GCE, ZTF-8/GCE and CuO/ZTF-8/GCE recorded in the presence of 2.5 mM [Fe(CN)<sub>6</sub>]<sup>3-</sup> in 0.1 M KCl.

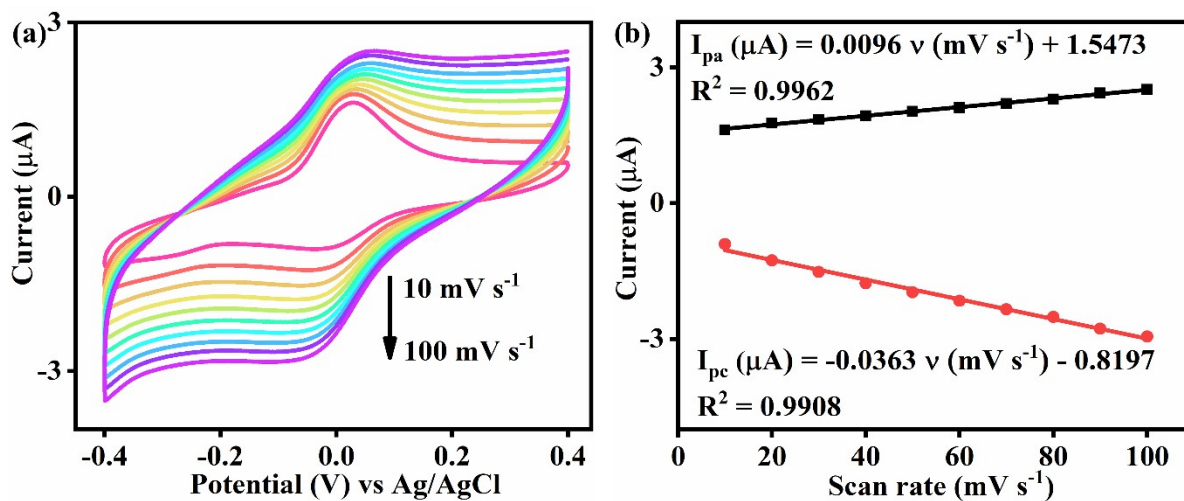

**Fig. S9** (a) Effect of scan rate of CuO/ZTF-8/GCE at different scan rates from 10 mV s<sup>-1</sup> to 100 mV s<sup>-1</sup>. (b) Plot of peak currents vs scan rate.

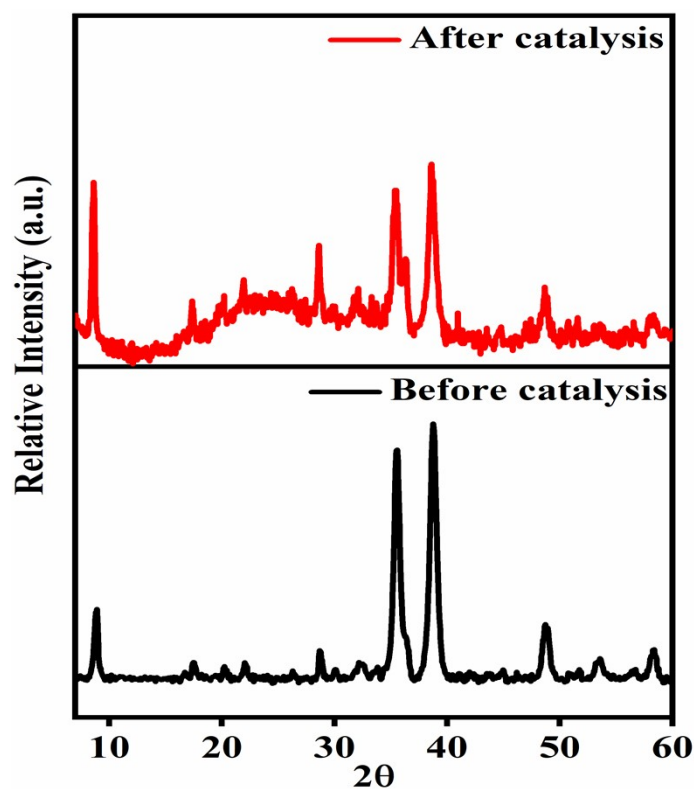

**Fig. S10** PXRD pattern of CuO/ZTF-8 nanocomposite before and after catalysis.

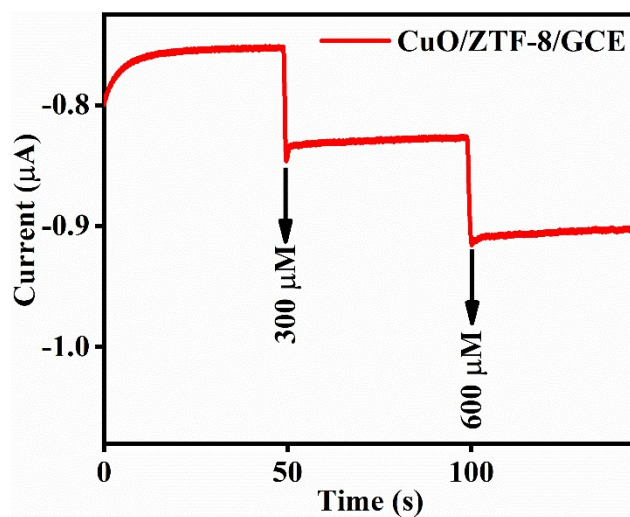

**Fig. S11** Amperometric response of CuO/ZTF-8/GCE at -0.2 V for successive addition of  $O_2^-$  to serum sample in 0.1 M PBS (pH = 7;  $N_2$  saturated).
